# Supplementary material for: Application of variable selection in the origin discrimination of Wolfiporia cocos (F.A. Wolf) Ryvarden & Gilb. based on near infrared spectroscopy
Source: PubMed Central journal article supplement (PMC5758700; doi:10.1038/s41598-017-18458-9), 2018-01-08
Supplement: 41598_2017_18458_MOESM1_ESM.pdf [file 41598_2017_18458_MOESM1_ESM.pdf]

**Application of variable selection in the origin discrimination of *Wolfiporia cocos***

**(F.A. Wolf) Ryvardeen & Gilb. based on near infrared spectroscopy**

**Tianjun Yuan<sup>1,2</sup>, Yanli Zhao<sup>1</sup>, Ji Zhang<sup>1</sup> & Yuanzhong Wang<sup>1</sup>**

<sup>1</sup> Institute of Medicinal Plants, Yunnan Academy of Agricultural Sciences, Kunming 650200, China. <sup>2</sup> Yunnan Comtestor CO., LTD., Kunming 650106, China. Correspondence should be addressed to Y.Z. Wang (e-mail:boletus@126.com)

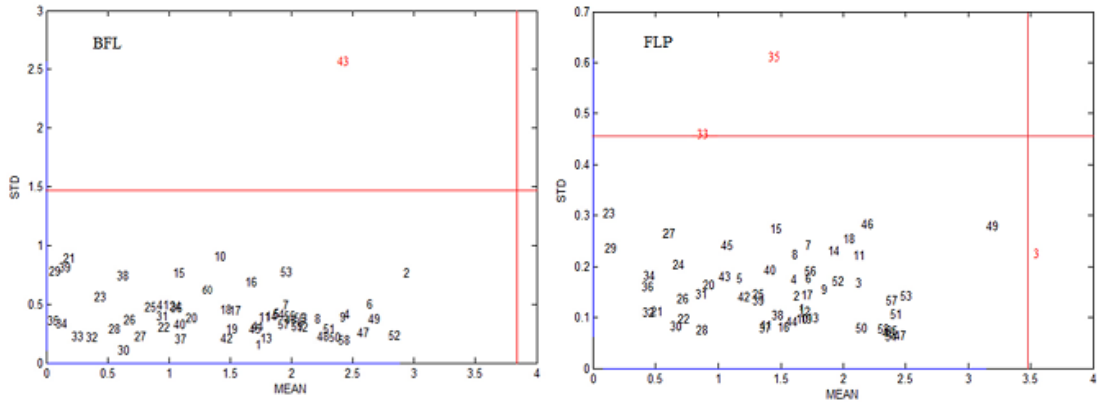

**Supplementary Figure S1** Singular sample diagnosis. The number of samples 43 of BFL, 3, 33 and 35 of FLP were diagnosed as singular samples.

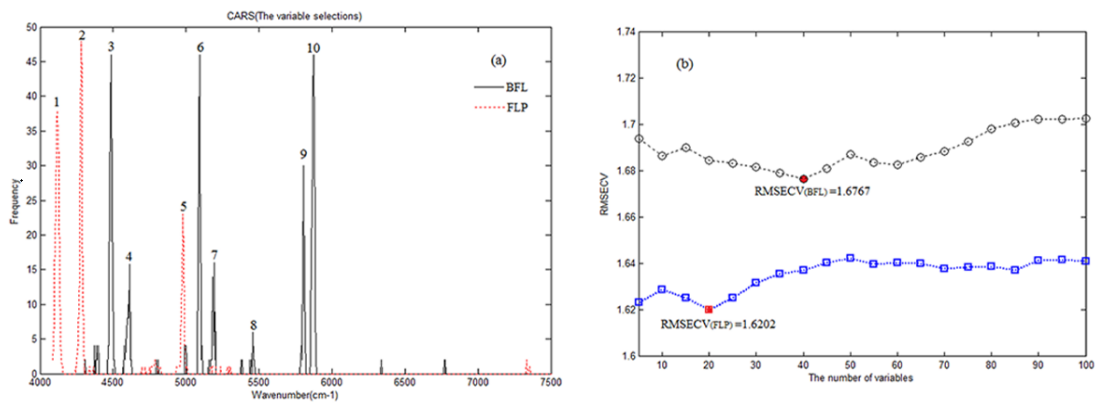

**Supplementary Figure S2** The selected frequency (a) and number (b) of variables of BFL and FLP by CARS. The selected wavelengths were mainly distributed in three regions marked by 1, 2 and 5 for FLP, and seven regions denoted by 3, 4, 6, 7, 8, 9 and 10 for BFL, respectively.

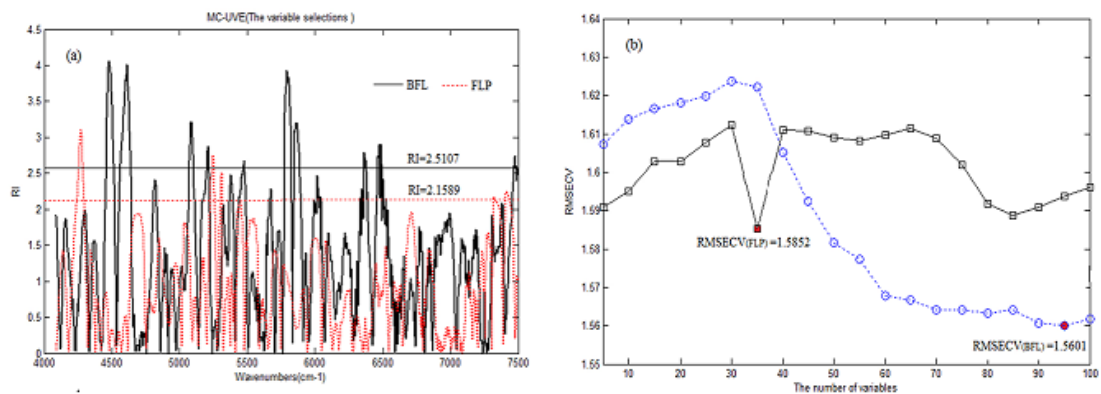

**Supplementary Figure S3** RI threshold (a) and selected number (b) of variables of BFL and FLP by MC-UVE. The variables with the RI values greater than the thresholds were selected.

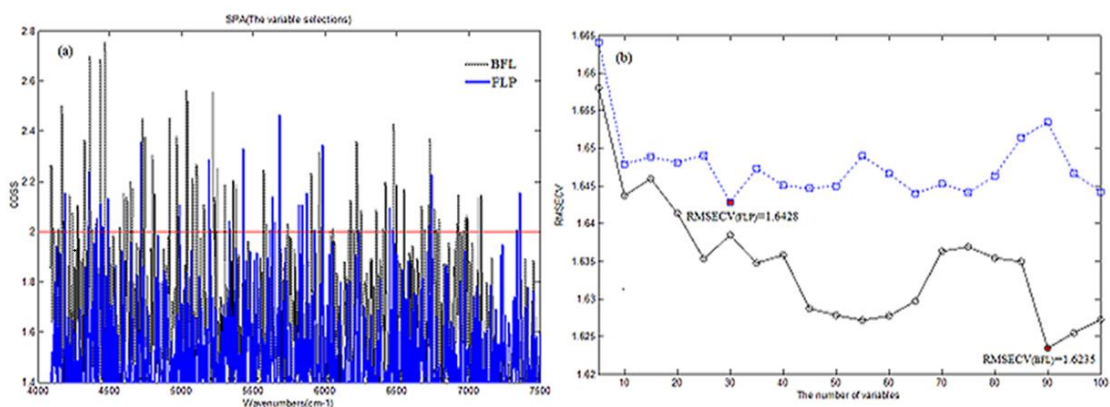

**Supplementary Figure S4** COSS values (a) and selected number (b) of variables of BFL and FLP by SPA. The variables with COSS values greater than 2 were selected.

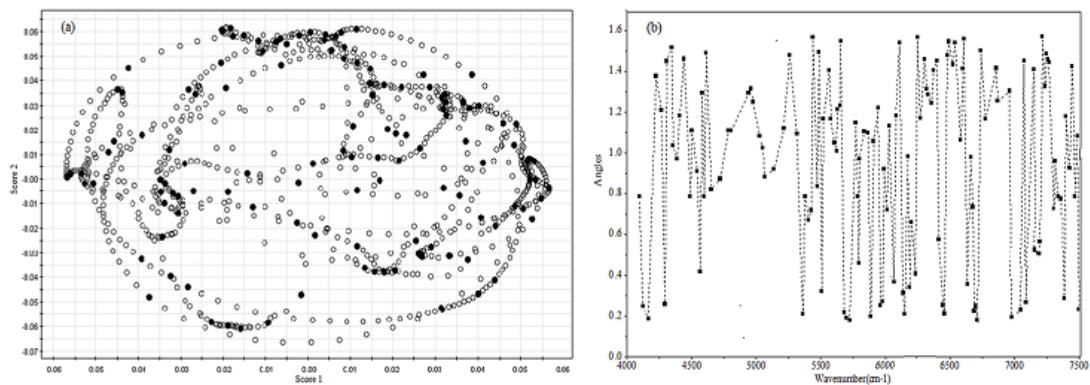

**Supplementary Fig. S5** LPG (a) and the selected variables (b) of BFL. Fig. S5a showed the LPG (score 1 vs. score 2) of BFL, in which the solid dots were the variables at the inflections. Fig. S5b demonstrated the sites of the selected variables in the actual spectrum.

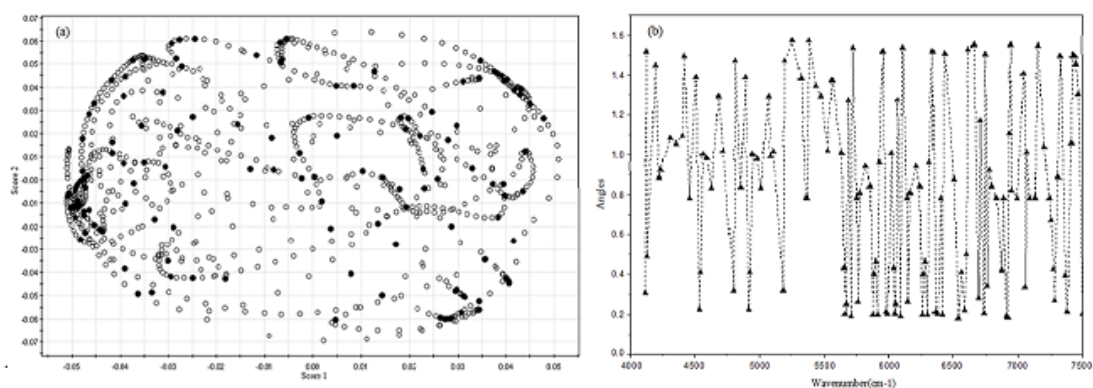

**Supplementary Fig. S6** LPG (a) and the selected variables (b) of FLP. Fig. S6a showed the LPG (score 1 vs. score 2) of BFL, in which the solid dots were the variables at the inflections. Fig. S6b demonstrated the sites of the selected variables in the actual spectrum.

**Supplementary Table S1** Selection of the number of principal component

| Component | Initial eigenvalues |               |              | Initial eigenvalues |               |              |
|-----------|---------------------|---------------|--------------|---------------------|---------------|--------------|
|           | Total               | % of variance | Cumulative % | Total               | % of variance | Cumulative % |
|           |                     | of BFL        | of BFL       |                     | of FLP        | of FLP       |
| 1         | 13.22               | 65.488        | 65.488       | 20.281              | 59.047        | 59.047       |
| 2         | 3.368               | 16.69         | 82.178       | 7.724               | 22.487        | 81.534       |
| 3         | 1.817               | 8.999         | 91.177       | 2.637               | 7.678         | 89.212       |
| 4         | 1.149               | 5.688         | 96.865       | 1.644               | 4.787         | 93.999       |
| 5         | 1.050               | 0.993         | 97.858       | 1.101               | 3.204         | 97.203       |

**Supplementary Table S2** Detail information of *Wolfiporia cocos* samples from Yunnan Province.

| Number | Collection sites   | Classification | Number | Collection sites    | Classification |
|--------|--------------------|----------------|--------|---------------------|----------------|
| FL-01  | Yuan jiang, Yuxi   | 1              | FL-31  | Eshan, Yuxi         | 1              |
| FL-02  | Yuanjiang, Yuxi    | 1              | FL-32  | Eshan, Yuxi         | 1              |
| FL-03  | Jianshui, Honghe   | 5              | FL-33  | Nanhua, Chuxiong    | 2              |
| FL-04  | Luxi, Honghe       | 5              | FL-34  | Xinping, Yuxi       | 1              |
| FL-05  | Xinping, Yuxi      | 1              | FL-35  | Xincun, Chuxiong    | 2              |
| FL-06  | Shangri-La, Diqing | 3              | FL-36  | Xinping, Yuxi       | 1              |
| FL-07  | Shangri-La, Diqing | 3              | FL-37  | Zhenyuan, Pu'er     | 4              |
| FL-08  | Shangri-La, Diqing | 3              | FL-38  | Mojiang, Pu'er      | 4              |
| FL-09  | Shiping, Honghe    | 5              | FL-39  | Xinping, Yuxi       | 1              |
| FL-10  | Zhenyuan, Pu'er    | 4              | FL-40  | Luquan, Kunming     | 1              |
| FL-11  | Tengchong, Baoshan | 2              | FL-41  | Jingdong, Pu'er     | 4              |
| FL-12  | Ninglang, Lijiang  | 3              | FL-42  | Daguokou, Chuxiong  | 2              |
| FL-13  | Mile, Honghe       | 5              | FL-43  | Jingdong, Pu'er     | 4              |
| FL-14  | Shiping, Honghe    | 5              | FL-44  | Xinping, Yuxi       | 1              |
| FL-15  | Zhenyuan, Pu'er    | 4              | FL-45  | Zhenyuan, Pu'er     | 4              |
| FL-16  | Shiping, Honghe    | 5              | FL-46  | Shuangbai, Chuxiong | 2              |
| FL-17  | Shiping, Honghe    | 5              | FL-47  | Jingdong, Pu'er     | 4              |
| FL-18  | Jianshui, Honghe   | 5              | FL-48  | Eshan, Yuxi         | 1              |
| FL-19  | Shiping, Honghe    | 5              | FL-49  | Shuzuo, Chuxiong    | 2              |
| FL-20  | Eshan, Yuxi        | 1              | FL-50  | Eshan, Yuxi         | 1              |

| Number | Collection sites  | Classification | Number | Collection sites    | Classification |
|--------|-------------------|----------------|--------|---------------------|----------------|
| FL-21  | Shiping, Honghe   | 5              | FL-51  | Nanhua, Chuxiong    | 2              |
| FL-22  | Shiping, Honghe   | 5              | FL-52  | Shuangbai, Chuxiong | 2              |
| FL-23  | Kaiyuan, Honghe   | 5              | FL-53  | Xinping, Yuxi       | 1              |
| FL-24  | Jianshui, Honghe  | 5              | FL-54  | Shuangbai, Chuxiong | 2              |
| FL-25  | Shiping, Honghe   | 5              | FL-55  | Dadiji, Chuxiong    | 2              |
| FL-26  | Jinggu, Pu'er     | 4              | FL-56  | Zhenyuan, Pu'er     | 4              |
| FL-27  | Eshan, Yuxi       | 1              | FL-57  | Xinping, Yuxi       | 1              |
| FL-28  | Xinping, Yuxi     | 1              | FL-58  | Xinping, Yuxi       | 1              |
| FL-29  | Xishelu, Chuxiong | 2              | FL-59  | Xinping, Yuxi       | 1              |
| FL-30  | Bajiao, Chuxiong  | 2              | FL-60  | Weixi, Diqing       | 3              |

Note: The classification “1” represents the Central of Yunnan; “2” represents the western Yunnan; “3” represents the northwestern Yunnan; “4” represents the southwestern Yunnan; “5” represents the southeastern Yunnan.
